# Supplementary material for: An electrochemical ratiometric immunosensor for the detection of NMP22 based on ZIF-8@MWCNTs@Chit@Fc@AuNPs and AuPt-MB
Source: Royal Society of Chemistry journal article supplement (doi:10.1039/d4ay01066c), 2024-01-01
Supplement: d4ay01066c1.pdf [file d4ay01066c1.pdf]

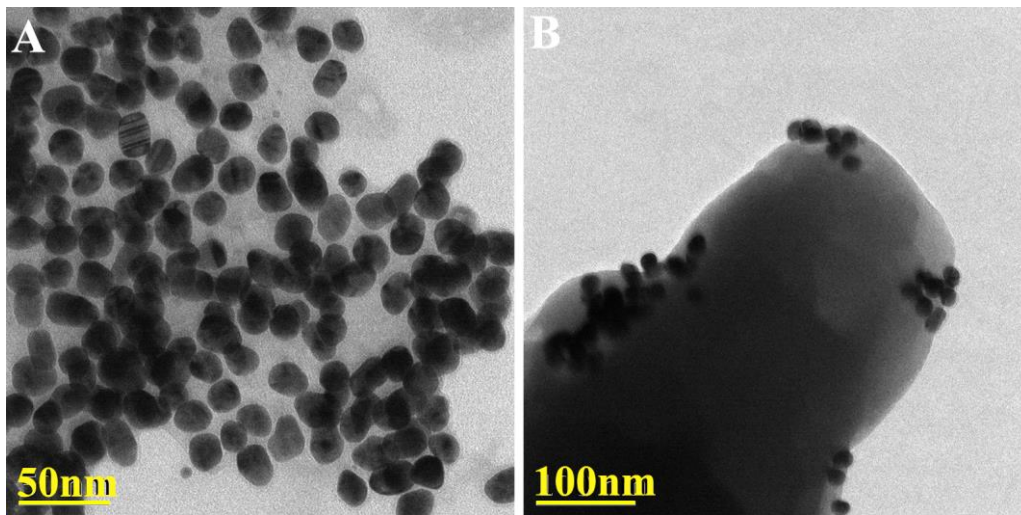

**Fig. S1.** TEM of AuNPs (A) and Fc@AuNPs (B).

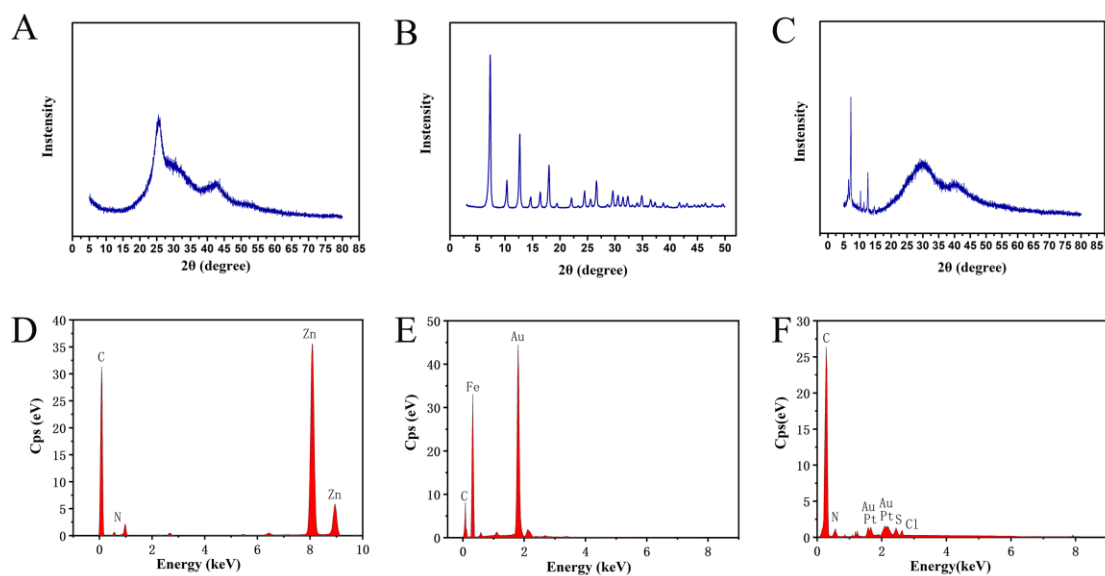

**Fig. S2.** XRD of MWCNTs (A), ZIF-8 (B) and ZIF-8@MWCNTs@Chits (C); EDS of the ZIF-8@MWCNTs@Chits (D), Fc@AuNPs (E) and AuPt-MB (F).

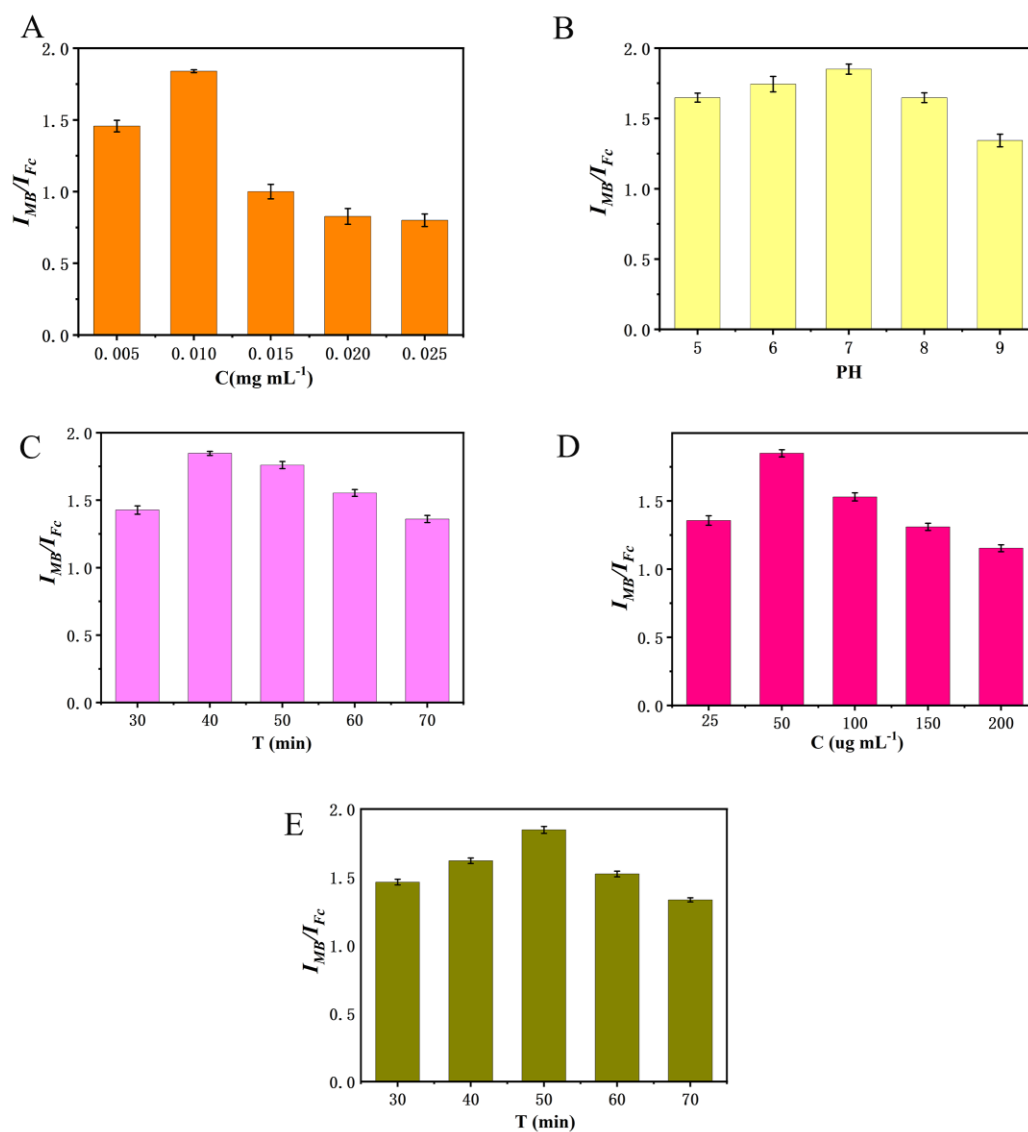

**Fig. S3.** Optimization of the experimental conditions (A) for concentration of the substrate material, (B) for the PH value of PBS, (C) for the incubation time of NMP22, (D) for the concentration of NMP22-Ab<sub>1</sub> and (E) for the incubation time of AuPt-MB-Ab<sub>2</sub>.

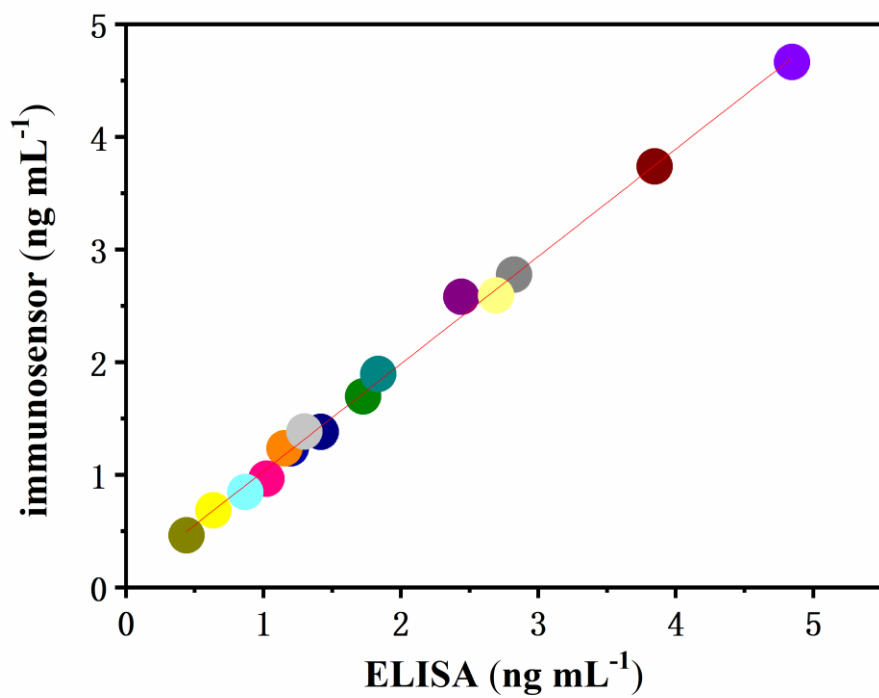

**Fig. S4.** Correlation analysis between ratiometric electrochemical immunosensor and human NMP22 ELISA kit for detection of human urinary NMP22 (n=16).

**Table S1** The comparison of methods to detection of nmp22.

| Sensor                                         | Material                                     | Linear range                                                  | Detection limit           | Ref.                        |
|------------------------------------------------|----------------------------------------------|---------------------------------------------------------------|---------------------------|-----------------------------|
| electrochemical<br>ratiometric<br>immunosensor | ZIF-<br>8@MWCNTs@Chit@<br>Fc@AuNPs           | 0.01 pg mL <sup>-1</sup> -1000 ng mL <sup>-1</sup>            | 3.33 fg mL <sup>-1</sup>  | This Work                   |
| dual-channel<br>immunosensor                   | sulfur-doped graphene<br>sheet<br>(S-GS)     | 0.1 pg mL <sup>-1</sup> -0.3 ng mL <sup>-1</sup>              | 25 fg mL <sup>-1</sup>    | Ren. et al <sup>43</sup>    |
| label-free<br>electrochemical<br>immunosensor  | AuNPs-PtNPs-MOFs                             | 0.005 -0.5 ng mL <sup>-1</sup><br>0.5 -20 ng mL <sup>-1</sup> | 1.7 ng mL <sup>-1</sup>   | Zhao. et al <sup>38</sup>   |
| microfluidic<br>immunoassay                    | polydimethylsiloxane<br>(PDMS)               | 4 -16 ng mL <sup>-1</sup>                                     | 2.57 ng mL <sup>-1</sup>  | Guan. et al <sup>9</sup>    |
| fluorescence<br>immunoassay                    | nitrogen doped carbon<br>dots (NCDs)         | 1.3 -16.3 ng mL <sup>-1</sup>                                 | 0.047 ng mL <sup>-1</sup> | Othman. et al <sup>44</sup> |
| label-free<br>electrochemical<br>immunosensor  | rGO-TEPA@Cu-<br>MOFs@SiO <sub>2</sub> @AgNPs | 0.1 pg mL <sup>-1</sup> -1000 ng mL <sup>-1</sup>             | 33.3 fg mL <sup>-1</sup>  | Rong. et al <sup>45</sup>   |

**Table S2** Ratiometric electrochemical immunosensor and ELISA kit for the detection of NMP22 in urine.

| <b>Sample</b> | <b>ELISA</b> | <b>Sensor</b> | <b>Relative error (%)</b> |
|---------------|--------------|---------------|---------------------------|
| 1             | 0.637        | 0.682         | -6.93                     |
| 2             | 0.44         | 0.461         | -4.81                     |
| 3             | 1.418        | 1.381         | 2.61                      |
| 4             | 2.44         | 2.578         | -5.68                     |
| 5             | 3.846        | 3.736         | 2.87                      |
| 6             | 1.725        | 1.695         | 1.73                      |
| 7             | 1.835        | 1.893         | -3.17                     |
| 8             | 1.198        | 1.234         | -3.02                     |
| 9             | 1.154        | 1.234         | -6.94                     |
| 10            | 4.846        | 4.665         | 3.74                      |
| 11            | 1.022        | 0.964         | 5.67                      |
| 12            | 4.604        | 4.447         | 3.42                      |
| 13            | 1.297        | 1.384         | -6.71                     |
| 14            | 2.824        | 2.777         | 1.68                      |
| 15            | 2.692        | 2.59          | 3.78                      |
| 16            | 0.868        | 0.847         | 2.49                      |

## Reference

1. X. Ren, H. Ma, T. Zhang, Y. Zhang, T. Yan, B. Du and Q. Wei, *ACS applied materials & interfaces*, 2017, **9**, 37637-37644.
2. S. Zhao, Y. Zhang, S. Ding, J. Fan, Z. Luo, K. Liu, Q. Shi, W. Liu and G. Zang, *Journal of Electroanalytical Chemistry*, 2019, **834**, 33-42.
3. X. Guan, D. Lu, Z. Chen, Z. Wang, G. Zhou and Y. Fan, *Analytical Methods*, 2023, **15**, 3275-3285.
4. H. O. Othman, F. Salehnia, M. Hosseini, R. Hassan, A. Faizullah and M. R. Ganjali, *Microchemical Journal*, 2020, **157**, 104966.
5. S. Rong, L. Zou, Y. Zhu, Z. Zhang, H. Liu, Y. Zhang, H. Zhang, H. Gao, H. Guan and J. Dong, *Microchemical Journal*, 2021, **168**, 106410.
